# Supplementary material for: Adverse Event Reporting with Immune Checkpoint Inhibitors in Older Patients: Age Subgroup Disproportionality Analysis in VigiBase
Source: PubMed Central journal article supplement (PMC7961480; doi:10.3390/cancers13051131), 2021-03-06
Supplement: cancers-13-01131-s001.pdf [file cancers-13-01131-s001.pdf]

| Toxicities (MedDRA SOCs)                                             | ICIs <i>versus</i> other antineoplastic drugs,<br><u>entire datasets</u> (as of August 30 <sup>th</sup> , 2020) |       |        |         |                            |
|----------------------------------------------------------------------|-----------------------------------------------------------------------------------------------------------------|-------|--------|---------|----------------------------|
|                                                                      | (a)                                                                                                             | (b)   | (c)    | (d)     | ROR (95% CI)               |
| Blood and lymphatic system disorders                                 | 4518                                                                                                            | 86803 | 315515 | 1911747 | 0.32 (0.31-0.33)           |
| Cardiac disorders                                                    | 3664                                                                                                            | 87657 | 112629 | 2114633 | 0.78 (0.76-0.81)           |
| Congenital, familial and genetic disorders                           | 84                                                                                                              | 91237 | 5062   | 2222200 | 0.40 (0.33-0.50)           |
| Ear and labyrinth disorders                                          | 452                                                                                                             | 90869 | 18022  | 2209240 | 0.61 (0.56-0.67)           |
| Endocrine disorders                                                  | 7024                                                                                                            | 84297 | 9490   | 2217772 | <b>19.47 (18.87-20.10)</b> |
| Eye disorders                                                        | 2040                                                                                                            | 89281 | 58226  | 2169036 | 0.85 (0.81-0.89)           |
| Gastrointestinal disorders                                           | 16205                                                                                                           | 75116 | 475119 | 1752143 | 0.80 (0.78-0.81)           |
| General disorders and administration site conditions                 | 26288                                                                                                           | 65033 | 667697 | 1559565 | 0.94 (0.93-0.96)           |
| Hepatobiliary disorders                                              | 5002                                                                                                            | 86319 | 52316  | 2174946 | <b>2.41 (2.34-2.48)</b>    |
| Immune system disorders                                              | 1654                                                                                                            | 89667 | 66307  | 2160955 | 0.60 (0.57-0.63)           |
| Infections and infestations                                          | 8614                                                                                                            | 82707 | 245888 | 1981374 | 0.84 (0.82-0.86)           |
| Injury, poisoning and procedural complications                       | 12519                                                                                                           | 78802 | 171272 | 2055990 | <b>1.91 (1.87-1.94)</b>    |
| Investigations                                                       | 8515                                                                                                            | 82806 | 288259 | 1939003 | 0.69 (0.68-0.71)           |
| Metabolism and nutrition disorders                                   | 6565                                                                                                            | 84756 | 128810 | 2098452 | <b>1.26 (1.23-1.29)</b>    |
| Musculoskeletal and connective tissue disorders                      | 7439                                                                                                            | 83882 | 149917 | 2077345 | <b>1.23 (1.20-1.26)</b>    |
| Neoplasms benign, malignant and unspecified (incl. cysts and polyps) | 13491                                                                                                           | 77830 | 154031 | 2073231 | <b>2.33 (2.29-2.38)</b>    |
| Nervous system disorders                                             | 8513                                                                                                            | 82808 | 277995 | 1949267 | 0.72 (0.70-0.74)           |
| Pregnancy, puerperium and perinatal conditions                       | 45                                                                                                              | 91276 | 3753   | 2223509 | 0.29 (0.22-0.39)           |
| Product issues                                                       | 118                                                                                                             | 91203 | 6848   | 2220414 | 0.42 (0.35-0.50)           |
| Psychiatric disorders                                                | 2280                                                                                                            | 89041 | 84290  | 2142972 | 0.65 (0.62-0.68)           |
| Renal and urinary disorders                                          | 3899                                                                                                            | 87422 | 80022  | 2147240 | <b>1.20 (1.16-1.24)</b>    |
| Reproductive system and breast disorders                             | 336                                                                                                             | 90985 | 14005  | 2213257 | 0.58 (0.52-0.65)           |
| Respiratory, thoracic and mediastinal disorders                      | 14684                                                                                                           | 76637 | 240455 | 1986807 | <b>1.58 (1.55-1.61)</b>    |
| Skin and subcutaneous tissue disorders                               | 10087                                                                                                           | 81234 | 356538 | 1870724 | 0.65 (0.64-0.67)           |
| Social circumstances                                                 | 175                                                                                                             | 91146 | 9648   | 2217614 | 0.44 (0.38-0.51)           |
| Surgical and medical procedures                                      | 1249                                                                                                            | 90072 | 26325  | 2200937 | <b>1.16 (1.09-1.23)</b>    |
| Vascular disorders                                                   | 2950                                                                                                            | 88371 | 137541 | 2089721 | 0.51 (0.49-0.53)           |

**Table S1** Disproportionality analysis on entire datasets (without age restrictions and including safety reports lacking information on patient age)

(a) Number of safety reports concerning the toxicity of interest reported in association with ICIs

(b) Number of safety reports concerning toxicities other than the one of interest reported in association with ICIs

(c) Number of safety reports concerning the toxicity of interest reported in association with other antineoplastic drugs

(d) Number of safety reports concerning toxicities other than the one of interest reported in association with other antineoplastic drugs

In bold are signals of disproportionate reporting

*Abbreviations:* MedDRA, medical dictionary for regulatory activities; SOC, system organ class; ICI, immune checkpoint inhibitor; ROR, reporting odds ratio; CI, confidence interval

| Toxicities (MedDRA SOCs)                                             | ICIs <i>versus</i> other antineoplastic drugs |     |       |       |                          | ICIs <i>versus</i> other antineoplastic drugs |       |        |        |                            |
|----------------------------------------------------------------------|-----------------------------------------------|-----|-------|-------|--------------------------|-----------------------------------------------|-------|--------|--------|----------------------------|
|                                                                      | < 18 years                                    |     |       |       |                          | 18-64 years                                   |       |        |        |                            |
|                                                                      | (a)                                           | (b) | (c)   | (d)   | ROR (95% CI)             | (a)                                           | (b)   | (c)    | (d)    | ROR (95% CI)               |
| Blood and lymphatic system disorders                                 | 16                                            | 157 | 9650  | 48707 | 0.51 (0.31-0.86)         | 1519                                          | 23733 | 145245 | 717790 | 0.32 (0.30-0.33)           |
| Cardiac disorders                                                    | 5                                             | 168 | 2298  | 56059 | 0.73 (0.30-1.77)         | 986                                           | 24266 | 38459  | 824576 | 0.87 (0.82-0.93)           |
| Congenital, familial and genetic disorders                           | 2                                             | 171 | 440   | 57917 | NC                       | 23                                            | 25229 | 1778   | 861257 | 0.44 (0.29-0.67)           |
| Ear and labyrinth disorders                                          | -                                             | 173 | 538   | 57819 | NA                       | 110                                           | 25142 | 6700   | 856335 | 0.56 (0.46-0.68)           |
| Endocrine disorders                                                  | 5                                             | 168 | 364   | 57993 | <b>4.74 (1.94-11.61)</b> | 2308                                          | 22944 | 4016   | 859019 | <b>21.52 (20.41-22.68)</b> |
| Eye disorders                                                        | 4                                             | 169 | 1679  | 56678 | NC                       | 634                                           | 24618 | 19179  | 843856 | <b>1.13 (1.05-1.23)</b>    |
| Gastrointestinal disorders                                           | 29                                            | 144 | 13667 | 44690 | 0.66 (0.44-0.98)         | 5217                                          | 20035 | 199672 | 663363 | 0.87 (0.84-0.89)           |
| General disorders and administration site conditions                 | 39                                            | 134 | 12405 | 45952 | 1.08 (0.75-1.54)         | 6427                                          | 18825 | 235719 | 627316 | 0.91 (0.88-0.94)           |
| Hepatobiliary disorders                                              | 12                                            | 161 | 2737  | 55620 | 1.51 (0.84-2.73)         | 1711                                          | 23541 | 23269  | 839766 | <b>2.62 (2.49-2.76)</b>    |
| Immune system disorders                                              | 9                                             | 164 | 3341  | 55016 | 0.90 (0.46-1.77)         | 585                                           | 24667 | 28477  | 834558 | 0.70 (0.64-0.76)           |
| Infections and infestations                                          | 13                                            | 160 | 6513  | 51844 | 0.65 (0.37-1.14)         | 2614                                          | 22638 | 84199  | 778836 | <b>1.07 (1.03-1.11)</b>    |
| Injury, poisoning and procedural complications                       | 63                                            | 110 | 4514  | 53843 | <b>6.83 (5.00-9.33)</b>  | 2835                                          | 22417 | 47168  | 815867 | <b>2.19 (2.10-2.28)</b>    |
| Investigations                                                       | 24                                            | 149 | 6784  | 51573 | 1.22 (0.80-1.89)         | 2547                                          | 22705 | 103746 | 759289 | 0.82 (0.79-0.86)           |
| Metabolism and nutrition disorders                                   | 15                                            | 158 | 2915  | 55442 | <b>1.81 (1.06-3.07)</b>  | 2045                                          | 23207 | 44649  | 818386 | <b>1.62 (1.54-1.69)</b>    |
| Musculoskeletal and connective tissue disorders                      | 11                                            | 162 | 2320  | 56037 | 1.64 (0.89-3.02)         | 1962                                          | 23290 | 60420  | 802615 | <b>1.12 (1.07-1.17)</b>    |
| Neoplasms benign, malignant and unspecified (incl. cysts and polyps) | 32                                            | 141 | 2509  | 55848 | <b>5.05 (3.43-7.43)</b>  | 3795                                          | 21457 | 48435  | 814600 | <b>2.97 (2.87-3.08)</b>    |
| Nervous system disorders                                             | 21                                            | 152 | 8383  | 49974 | 0.82 (0.52-1.30)         | 2635                                          | 22617 | 110065 | 752970 | 0.80 (0.77-0.83)           |
| Pregnancy, puerperium and perinatal conditions                       | 4                                             | 169 | 177   | 58180 | NC                       | 20                                            | 25232 | 1516   | 861519 | 0.45 (0.29-0.70)           |
| Product issues                                                       | -                                             | 173 | 141   | 58216 | NA                       | 23                                            | 25229 | 2007   | 861028 | 0.39 (0.26-0.59)           |
| Psychiatric disorders                                                | 3                                             | 170 | 1877  | 56480 | NC                       | 650                                           | 24602 | 33421  | 829614 | 0.66 (0.61-0.71)           |
| Renal and urinary disorders                                          | 6                                             | 167 | 2451  | 55906 | 0.82 (0.36-1.85)         | 1105                                          | 24147 | 25715  | 837320 | <b>1.49 (1.40-1.58)</b>    |
| Reproductive system and breast disorders                             | 1                                             | 172 | 277   | 58080 | NC                       | 107                                           | 25145 | 6443   | 856592 | 0.57 (0.47-0.69)           |
| Respiratory, thoracic and mediastinal disorders                      | 25                                            | 148 | 5175  | 53182 | <b>1.74 (1.14-2.65)</b>  | 4184                                          | 21068 | 93508  | 769527 | <b>1.63 (1.58-1.69)</b>    |
| Skin and subcutaneous tissue disorders                               | 11                                            | 162 | 9719  | 48638 | 0.34 (0.18-0.63)         | 2698                                          | 22554 | 164279 | 698756 | 0.51 (0.49-0.53)           |
| Social circumstances                                                 | -                                             | 173 | 72    | 58285 | NA                       | 73                                            | 25179 | 4244   | 858791 | 0.59 (0.47-0.74)           |
| Surgical and medical procedures                                      | 1                                             | 172 | 484   | 57873 | NC                       | 298                                           | 24954 | 8158   | 854877 | <b>1.25 (1.11-1.41)</b>    |
| Vascular disorders                                                   | 6                                             | 167 | 3139  | 55218 | 0.63 (0.28-1.43)         | 950                                           | 24302 | 55718  | 807317 | 0.57 (0.53-0.60)           |

**Table S2.** Subgroup disproportionality analysis in younger adults (as of August 30<sup>th</sup>, 2020). In bold: signals of disproportionate reporting.

(a) Number of safety reports concerning the toxicity of interest reported in association with ICIs.

(b) Number of safety reports concerning toxicities other than the one of interest reported in association with ICIs.

(c) Number of safety reports concerning the toxicity of interest reported in association with other antineoplastic drugs.

(d) Number of safety reports concerning toxicities other than the one of interest reported in association with other antineoplastic drugs.

*Abbreviations:* MedDRA, medical dictionary for regulatory activities; SOC, system organ class; ICI, immune checkpoint inhibitor; ROR, reporting odds ratio; CI, confidence interval; NC, not calculated (less than five safety reports); NA, not applicable.

| Toxicities<br>(MedDRA<br>SOCs)                                       | ICIs <i>versus</i><br>other antineoplastic drugs<br><u>65-74 years</u> |       |        |        |                            | ICIs <i>versus</i><br>other antineoplastic drugs<br><u>75-84 years</u> |      |       |        |                            | ICIs <i>versus</i><br>other antineoplastic drugs<br><u>≥ 85 years</u> |      |       |       |                            |
|----------------------------------------------------------------------|------------------------------------------------------------------------|-------|--------|--------|----------------------------|------------------------------------------------------------------------|------|-------|--------|----------------------------|-----------------------------------------------------------------------|------|-------|-------|----------------------------|
|                                                                      | (a)                                                                    | (b)   | (c)    | (d)    | ROR (95% CI)               | (a)                                                                    | (b)  | (c)   | (d)    | ROR (95% CI)               | (a)                                                                   | (b)  | (c)   | (d)   | ROR (95% CI)               |
| Blood and lymphatic system disorders                                 | 1122                                                                   | 18092 | 67200  | 332806 | 0.31 (0.29-0.33)           | 530                                                                    | 9278 | 30320 | 177300 | 0.33 (0.31-0.36)           | 61                                                                    | 1283 | 4214  | 33734 | 0.38 (0.29-0.49)           |
| Cardiac disorders                                                    | 1004                                                                   | 18210 | 22156  | 377850 | 0.94 (0.88-1.00)           | 591                                                                    | 9217 | 13641 | 193979 | 0.91 (0.84-0.99)           | 68                                                                    | 1276 | 2853  | 35095 | 0.66 (0.51-0.84)           |
| Congenital, familial and genetic disorders                           | 18                                                                     | 19126 | 625    | 399381 | 0.60 (0.37-0.96)           | 10                                                                     | 9798 | 286   | 207334 | 0.74 (0.39-1.39)           | -                                                                     | 1344 | 29    | 37919 | NA                         |
| Ear and labyrinth disorders                                          | 88                                                                     | 19126 | 2841   | 397165 | 0.64 (0.52-0.80)           | 47                                                                     | 9761 | 1787  | 205833 | 0.55 (0.41-0.74)           | 9                                                                     | 1335 | 439   | 37509 | 0.58 (0.30-1.12)           |
| Endocrine disorders                                                  | 1653                                                                   | 17561 | 1520   | 398486 | <b>24.68 (22.98-26.50)</b> | 724                                                                    | 9084 | 680   | 206940 | <b>24.25 (21.80-26.99)</b> | 96                                                                    | 1248 | 101   | 37847 | <b>28.82 (21.68-38.33)</b> |
| Eye disorders                                                        | 386                                                                    | 18828 | 9538   | 390468 | 0.84 (0.76-0.93)           | 213                                                                    | 9595 | 5932  | 201688 | 0.75 (0.66-0.87)           | 34                                                                    | 1310 | 1500  | 36448 | 0.63 (0.45-0.89)           |
| Gastrointestinal disorders                                           | 3512                                                                   | 15702 | 90073  | 309933 | 0.77 (0.74-0.80)           | 1647                                                                   | 8161 | 44850 | 162770 | 0.73 (0.69-0.77)           | 239                                                                   | 1105 | 7342  | 30606 | 0.90 (0.78-1.04)           |
| General disorders and administration site conditions                 | 4256                                                                   | 14958 | 113079 | 286927 | 0.72 (0.70-0.75)           | 2313                                                                   | 7495 | 62295 | 144695 | 0.71 (0.68-0.74)           | 408                                                                   | 936  | 13175 | 24773 | 0.82 (0.73-0.92)           |
| Hepatobiliary disorders                                              | 1135                                                                   | 18079 | 9138   | 390868 | <b>2.69 (2.52-2.86)</b>    | 593                                                                    | 9215 | 4209  | 203411 | <b>3.11 (2.85-3.40)</b>    | 64                                                                    | 1280 | 565   | 37383 | <b>3.31 (2.54-4.31)</b>    |
| Immune system disorders                                              | 314                                                                    | 18900 | 10748  | 389258 | 0.60 (0.54-0.67)           | 152                                                                    | 9656 | 4212  | 203408 | 0.76 (0.65-0.89)           | 19                                                                    | 1325 | 598   | 37350 | 0.90 (0.57-1.42)           |
| Infections and infestations                                          | 2096                                                                   | 17118 | 50850  | 349156 | 0.84 (0.80-0.88)           | 1118                                                                   | 8690 | 28576 | 179044 | 0.81 (0.76-0.86)           | 161                                                                   | 1183 | 5286  | 32662 | 0.84 (0.71-0.99)           |
| Injury, poisoning and procedural complications                       | 1728                                                                   | 17486 | 26231  | 373775 | <b>1.41 (1.34-1.48)</b>    | 906                                                                    | 8902 | 17003 | 190617 | <b>1.14 (1.06-1.22)</b>    | 169                                                                   | 1175 | 4131  | 35161 | 1.18 (1.00-1.39)           |
| Investigations                                                       | 1815                                                                   | 17399 | 54533  | 345473 | 0.66 (0.63-0.69)           | 892                                                                    | 8916 | 29988 | 177632 | 0.59 (0.55-0.64)           | 116                                                                   | 1228 | 5286  | 35759 | 0.58 (0.48-0.71)           |
| Metabolism and nutrition disorders                                   | 1656                                                                   | 17558 | 27811  | 372195 | <b>1.26 (1.20-1.33)</b>    | 900                                                                    | 8908 | 15768 | 191852 | <b>1.23 (1.15-1.32)</b>    | 119                                                                   | 1225 | 2787  | 35347 | <b>1.23 (1.01-1.49)</b>    |
| Musculoskeletal and connective tissue disorders                      | 1484                                                                   | 17730 | 25983  | 374023 | <b>1.20 (1.14-1.27)</b>    | 841                                                                    | 8967 | 12888 | 194732 | <b>1.42 (1.32-1.52)</b>    | 144                                                                   | 1200 | 2189  | 33141 | <b>1.96 (1.64-2.34)</b>    |
| Neoplasms benign, malignant and unspecified (incl. cysts and polyps) | 2388                                                                   | 16826 | 29218  | 370788 | <b>1.80 (1.72-1.88)</b>    | 1157                                                                   | 8651 | 15925 | 191695 | <b>1.61 (1.51-1.72)</b>    | 149                                                                   | 1195 | 2601  | 37945 | <b>1.69 (1.42-2.02)</b>    |

|                                                 |      |       |       |        |                         |      |      |       |        |                         |     |      |      |       |                         |
|-------------------------------------------------|------|-------|-------|--------|-------------------------|------|------|-------|--------|-------------------------|-----|------|------|-------|-------------------------|
| Nervous system disorders                        | 1838 | 17376 | 49752 | 350254 | 0.74 (0.71-0.78)        | 946  | 8862 | 26366 | 181254 | 0.73 (0.69-0.79)        | 138 | 1206 | 4807 | 37849 | 0.79 (0.66-0.94)        |
| Pregnancy, puerperium and perinatal conditions  | 1    | 19213 | 36    | 399970 | NC                      | -    | 9808 | 14    | 207606 | NA                      | -   | 1344 | 3    | 37945 | NA                      |
| Product issues                                  | 15   | 19199 | 1088  | 398918 | 0.29 (0.17-0.48)        | 9    | 9799 | 510   | 207110 | 0.37 (0.19-0.72)        | 1   | 1343 | 99   | 37849 | NC                      |
| Psychiatric disorders                           | 512  | 18702 | 13266 | 386740 | 0.80 (0.73-0.87)        | 274  | 9534 | 7289  | 200331 | 0.79 (0.70-0.89)        | 45  | 1299 | 1527 | 36421 | 0.83 (0.61-1.12)        |
| Renal and urinary disorders                     | 974  | 18240 | 16929 | 383077 | <b>1.21 (1.13-1.29)</b> | 578  | 9230 | 9978  | 197642 | <b>1.24 (1.14-1.35)</b> | 75  | 1269 | 1893 | 36055 | 1.13 (0.89-1.43)        |
| Reproductive system and breast disorders        | 53   | 19161 | 1746  | 398260 | 0.63 (0.48-0.83)        | 30   | 9778 | 874   | 206746 | 0.73 (0.50-1.04)        | 4   | 1340 | 149  | 37799 | NC                      |
| Respiratory, thoracic and mediastinal disorders | 4112 | 15102 | 51147 | 348859 | <b>1.86 (1.79-1.92)</b> | 2142 | 7666 | 26239 | 181381 | <b>1.93 (1.84-2.03)</b> | 210 | 1134 | 4099 | 33849 | <b>1.53 (1.32-1.78)</b> |
| Skin and subcutaneous tissue disorders          | 2009 | 17205 | 59931 | 340075 | 0.66 (0.63-0.69)        | 1119 | 8689 | 28006 | 179614 | 0.83 (0.78-0.88)        | 178 | 1166 | 4553 | 33395 | 1.12 (0.95-1.31)        |
| Social circumstances                            | 28   | 19186 | 1195  | 398811 | 0.49 (0.33-0.71)        | 18   | 9790 | 599   | 207021 | 0.64 (0.40-1.02)        | 5   | 1339 | 136  | 37812 | 1.04 (0.42-2.54)        |
| Surgical and medical procedures                 | 195  | 19019 | 4356  | 395650 | 0.93 (0.81-1.08)        | 89   | 9719 | 2534  | 205086 | 0.74 (0.60-0.92)        | 6   | 1338 | 601  | 37347 | 0.28 (0.12-0.62)        |
| Vascular disorders                              | 755  | 18459 | 27874 | 372132 | 0.55 (0.51-0.59)        | 329  | 9479 | 13640 | 193980 | 0.49 (0.44-0.55)        | 50  | 1294 | 2230 | 35718 | 0.62 (0.47-0.82)        |

**Table S3.** Disproportionality analysis in older adults by age subgroups (as of August 30<sup>th</sup>, 2020). In bold: signals of disproportionate reporting.

(a) Number of safety reports concerning the toxicity of interest reported in association with ICIs.

(b) Number of safety reports concerning toxicities other than the one of interest reported in association with ICIs.

(c) Number of safety reports concerning the toxicity of interest reported in association with other antineoplastic drugs.

(d) Number of safety reports concerning toxicities other than the one of interest reported in association with other antineoplastic drugs.

*Abbreviations:* MedDRA, medical dictionary for regulatory activities; SOC, system organ class; ICI, immune checkpoint inhibitor; ROR, reporting odds ratio; CI, confidence interval; NC, not calculated (less than five safety reports); NA, not applicable.
